# Supplementary material
Source: Springer Nature journal article supplement (https://www.springermedizin.de/resource/supplementary/12943_2013_1236_MOESM4_ESM.pdf/9552680)

**A**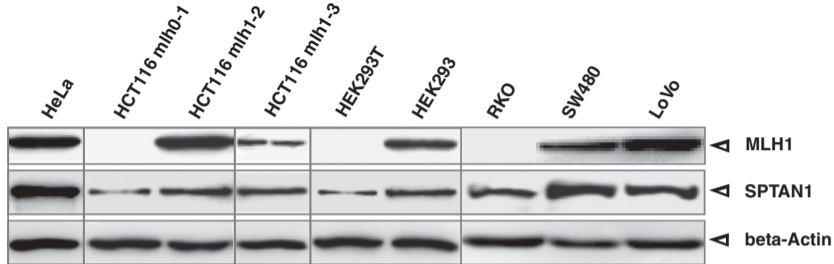**B**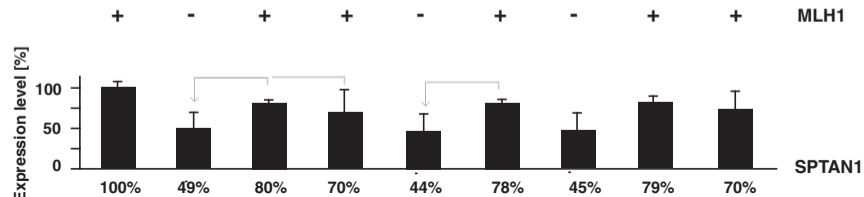

Supplement: MOESM4 [file 9552680]
